# Supplementary material
Source: ML conference proceedings conference paper supplement (https://aclanthology.org/2020.emnlp-main.624)
Supplement: OptionalSupplementaryMaterial [file 2020.emnlp-main.624.OptionalSupplementaryMaterial.zip]

Archive with 2 entries (2 files):
- Text_Games__camera_ready_app.pdf
- __MACOSX/._Text_Games__camera_ready_app.pdf
